# Supplementary material for: Wenn mehr Ganzheit gefordert wird – Agile Teams und ihre Personen
Source: Springer Nature journal article supplement (doi:10.1007/s11612-023-00719-z), 2023-11-06
Supplement: MOESM1 [file 26272342]

## Anhang

Korrelationsmatrix der untersuchten Variablen (Produkt-Moment-Korrelationen n. Pearson) sowie Mittelwerte und Standardabweichungen

| Variablen                        | Mean   | SD     | 1         | 2         | 3         | 4         | 5         | 6         | 7         | 8       | 9       | 10     | 11      | 12     | 13      | 14      | 15      | 16      | 17      | 18     | 19      | 20      | 21      | 22      | 23      | 24      |  |  |
|----------------------------------|--------|--------|-----------|-----------|-----------|-----------|-----------|-----------|-----------|---------|---------|--------|---------|--------|---------|---------|---------|---------|---------|--------|---------|---------|---------|---------|---------|---------|--|--|
| 1 Psychological safety ante      | 5,17   | 0,65   |           |           |           |           |           |           |           |         |         |        |         |        |         |         |         |         |         |        |         |         |         |         |         |         |  |  |
| 2 Psychological safety post      | 5,15   | 0,64   | ,769**    |           |           |           |           |           |           |         |         |        |         |        |         |         |         |         |         |        |         |         |         |         |         |         |  |  |
| 3 Extraversion                   | 3,54   | 1,02   | ,139*     | ,151**    |           |           |           |           |           |         |         |        |         |        |         |         |         |         |         |        |         |         |         |         |         |         |  |  |
| 4 Verträglichkeit                | 3,69   | 0,73   | ,133*     | 0,090     | 0,043     |           |           |           |           |         |         |        |         |        |         |         |         |         |         |        |         |         |         |         |         |         |  |  |
| 5 Gewissenhaftigkeit             | 3,87   | 0,83   | 0,111     | 0,111     | 0,054     | 0,075     |           |           |           |         |         |        |         |        |         |         |         |         |         |        |         |         |         |         |         |         |  |  |
| 6 Neurotizismus                  | 2,71   | 1,08   | -,178**   | -,165**   | -,266**   | -0,060    | -,143*    |           |           |         |         |        |         |        |         |         |         |         |         |        |         |         |         |         |         |         |  |  |
| 7 Offenheit                      | 3,64   | 0,90   | 0,007     | 0,013     | 0,064     | -0,039    | 0,102     | -0,034    |           |         |         |        |         |        |         |         |         |         |         |        |         |         |         |         |         |         |  |  |
| 8 Narzissmus_Grandiosität        | 3,05   | 0,87   | -,128*    | -,211**   | ,135*     | ,203**    | 0,006     | -,176**   | 0,028     |         |         |        |         |        |         |         |         |         |         |        |         |         |         |         |         |         |  |  |
| 9 Teamidentifikation affektiv    | 6,02   | 1,02   | ,570**    | ,444**    | 0,071     | 0,114     | 0,089     | -,139*    | -0,048    | -0,084  |         |        |         |        |         |         |         |         |         |        |         |         |         |         |         |         |  |  |
| 10 Teamidentifikation behavioral | 5,68   | 1,03   | ,382**    | ,328**    | 0,010     | ,129*     | ,121*     | -0,024    | -0,090    | -,133*  | ,597**  |        |         |        |         |         |         |         |         |        |         |         |         |         |         |         |  |  |
| 11 Teamidentifikation kognitiv   | 4,53   | 1,25   | ,382**    | ,406**    | 0,092     | ,115*     | ,148*     | -,140*    | -0,010    | -0,068  | ,425**  | ,379** |         |        |         |         |         |         |         |        |         |         |         |         |         |         |  |  |
| 12 Teampurpose                   | 4,53   | 0,96   | ,302**    | ,281**    | -0,004    | 0,011     | ,132*     | -0,110    | 0,013     | ,146*   | ,393**  | ,363** | ,531**  |        |         |         |         |         |         |        |         |         |         |         |         |         |  |  |
| 13 Teamperformance               | 4,81   | 0,79   | ,497**    | ,456**    | 0,034     | 0,112     | ,203**    | -,157**   | 0,025     | -0,061  | ,350**  | ,264** | ,390**  | ,318** |         |         |         |         |         |        |         |         |         |         |         |         |  |  |
| 14 Teilnehmerzufriedenheit       | 5,13   | 0,68   | ,283**    | ,417**    | 0,077     | -0,005    | 0,034     | 0,006     | 0,011     | -0,009  | 0,104   | 0,079  | ,205**  | ,226** | ,310**  |         |         |         |         |        |         |         |         |         |         |         |  |  |
| 15 Situation ergebnisorientiert  | 4,81   | 0,75   | ,320**    | ,432**    | 0,108     | 0,005     | 0,037     | 0,032     | 0,100     | -0,112  | ,174**  | ,119*  | ,271**  | ,147*  | ,251**  | ,526**  |         |         |         |        |         |         |         |         |         |         |  |  |
| 16 Situation monoton             | 4,36   | 0,86   | -,288**   | -,389**   | -,115*    | 0,000     | -,153**   | 0,045     | -,119*    | ,241**  | -,247** | -,120* | -,252** | -0,085 | -,293** | -,303** | -,422** |         |         |        |         |         |         |         |         |         |  |  |
| 17 Situation belebt              | 4,83   | 0,77   | ,206**    | ,307**    | 0,102     | -0,046    | -0,001    | 0,003     | ,190**    | -0,106  | ,123*   | 0,070  | ,117*   | 0,061  | ,147*   | ,297**  | ,502**  | -,446** |         |        |         |         |         |         |         |         |  |  |
| 18 Situation kognitiv load       | 1,76   | 0,75   | ,151**    | 0,079     | -0,036    | -0,016    | 0,019     | 0,041     | 0,052     | 0,068   | ,194**  | ,170** | ,141*   | ,234** | ,121*   | ,164**  | ,241**  | -,212** | ,406**  |        |         |         |         |         |         |         |  |  |
| 19 Situation psychischer load    | 2,33   | 1,01   | -,233**   | -,428**   | -,137*    | -0,062    | -0,073    | 0,019     | -0,041    | ,222**  | -,164** | -0,056 | -,201** | -0,001 | -,118*  | -,357** | -,425** | ,407**  | -,178** | ,242** |         |         |         |         |         |         |  |  |
| 20 Einfluss                      | 0,44   | 0,37   | 0,068     | 0,076     | ,224**    | -0,023    | 0,036     | -,238**   | 0,070     | 0,083   | -0,059  | -0,078 | -0,077  | -0,078 | -0,089  | 0,054   | 0,093   | -0,102  | 0,078   | -0,053 | -0,056  |         |         |         |         |         |  |  |
| 21 Vertrauen                     | 0,44   | 0,30   | 0,057     | 0,110     | ,146*     | 0,009     | -0,023    | -0,073    | 0,044     | 0,011   | -0,061  | -0,012 | -0,035  | -0,028 | -0,070  | 0,095   | 0,075   | -0,091  | 0,100   | -0,003 | -0,043  | ,442**  |         |         |         |         |  |  |
| 22 Irritation                    | 0,40   | 0,32   | -,146*    | -,120*    | 0,071     | -0,029    | 0,010     | 0,024     | -,118*    | 0,111   | -0,088  | -,117* | 0,000   | 0,013  | -0,064  | -0,055  | -0,021  | 0,072   | -0,055  | -0,012 | -0,010  | -,170** | -,314** |         |         |         |  |  |
| 23 Agilität                      | 3,82   | 1,00   | 0,059     | 0,061     | -0,088    | 0,008     | -0,073    | ,138*     | 0,034     | 0,050   | -0,006  | 0,056  | -0,077  | -0,100 | ,142*   | ,206**  | 0,016   | -0,009  | 0,084   | 0,067  | 0,078   | -0,011  | -0,015  | -0,050  |         |         |  |  |
| 24 Flexibilität                  | 2,99   | 1,19   | -0,089    | -0,072    | -0,038    | 0,032     | -0,083    | ,153*     | 0,097     | 0,064   | -0,101  | -0,108 | -,150*  | -,161* | -,181** | 0,042   | 0,090   | 0,032   | -0,086  | -0,096 | -0,027  | 0,016   | 0,009   | 0,004   | ,198**  |         |  |  |
| 25 Remote                        | 4,09   | 1,03   | -0,058    | -0,053    | -0,042    | ,163*     | -0,092    | -0,045    | -0,018    | ,133*   | -0,039  | -0,063 | -0,083  | -0,121 | -0,110  | 0,090   | -0,034  | ,148*   | -0,113  | -0,054 | 0,077   | 0,094   | 0,089   | 0,071   | ,162*   | 0,011   |  |  |
| 26 Innovativität                 | 3,53   | 1,09   | 0,026     | 0,029     | -,176**   | 0,094     | -0,013    | ,147*     | 0,032     | 0,111   | 0,040   | -0,010 | -0,020  | 0,030  | 0,052   | ,246**  | 0,051   | 0,014   | -0,118  | -0,108 | -0,054  | 0,053   | 0,053   | -0,028  | ,363**  | ,191**  |  |  |
| 27 Anzahl Beiträge pro Person    | 56,64  | 28,82  | 0,109     | ,143*     | ,321**    | -0,035    | 0,018     | -,130*    | 0,015     | 0,037   | 0,092   | 0,073  | 0,048   | 0,003  | 0,009   | ,128*   | ,138*   | -,216** | ,167**  | 0,090  | -0,095  | ,549**  | ,357**  | -0,005  | -0,068  | 0,040   |  |  |
| 28 Sprechzeit pro Person in Sek. | 488,81 | 273,42 | 0,081     | 0,102     | ,305**    | -0,032    | 0,070     | -,162**   | 0,056     | ,126*   | -0,018  | -0,031 | 0,016   | 0,028  | -0,043  | ,134*   | 0,081   | -,132*  | 0,031   | -0,026 | -0,031  | ,666**  | ,394**  | -0,016  | 0,028   | 0,022   |  |  |
| 29 Alter in Jahren               | 31,68  | 7,78   | -0,032    | 0,033     | -0,066    | -0,065    | 0,114     | -0,049    | ,133*     | -,128*  | 0,009   | 0,029  | ,131*   | 0,040  | 0,111   | -0,065  | 0,039   | -,139*  | 0,034   | 0,007  | -,125*  | 0,016   | -0,073  | 0,004   | -0,076  | -,216** |  |  |
| 30 Teamgröße                     | 5,79   | 1,32   | 0,112     | 0,046     | -0,112    | -0,058    | -0,007    | 0,112     | 0,034     | -,192** | ,163**  | 0,066  | 0,090   | -0,090 | ,131*   | -0,074  | 0,056   | -,117*  | ,144*   | 0,092  | -0,049  | -,313** | -,368** | -,328** | 0,097   | -0,070  |  |  |
| 31 Teamzugehörigkeit in Monaten  | 20,33  | 33,96  | 0,022     | 0,025     | 0,091     | -0,076    | 0,080     | 0,003     | 0,068     | -,179** | 0,056   | -0,050 | ,188**  | 0,042  | 0,041   | -0,019  | 0,091   | -,177** | 0,082   | 0,014  | -,192** | -0,006  | -0,021  | -0,037  | -,233** | -,145*  |  |  |
| 32 Teamergebnis Gruppenaufgabe   | 55,60  | 14,21  | 0,094     | ,132*     | 0,104     | -,120*    | ,210**    | -0,061    | ,141*     | -,207** | -0,028  | -0,007 | 0,081   | -0,012 | ,195**  | -0,004  | ,115**  | -,236** | ,156**  | 0,043  | -0,113  | -0,097  | -0,115  | -0,066  | ,212**  | -0,041  |  |  |
|                                  |        |        | <b>25</b> | <b>26</b> | <b>27</b> | <b>28</b> | <b>29</b> | <b>30</b> | <b>31</b> |         |         |        |         |        |         |         |         |         |         |        |         |         |         |         |         |         |  |  |
| 26 Innovativität                 |        |        | ,251**    |           |           |           |           |           |           |         |         |        |         |        |         |         |         |         |         |        |         |         |         |         |         |         |  |  |
| 27 Anzahl Beiträge pro Person    |        |        | -0,021    | 0,105     |           |           |           |           |           |         |         |        |         |        |         |         |         |         |         |        |         |         |         |         |         |         |  |  |
| 28 Sprechzeit pro Person in Sek. |        |        | ,200**    | ,142*     | ,768**    |           |           |           |           |         |         |        |         |        |         |         |         |         |         |        |         |         |         |         |         |         |  |  |
| 29 Alter in Jahren               |        |        | -,181**   | -,302**   | -0,047    | -0,043    |           |           |           |         |         |        |         |        |         |         |         |         |         |        |         |         |         |         |         |         |  |  |
| 30 Teamgröße                     |        |        | -,330**   | -,188**   | -,287**   | -,405**   | ,243**    |           |           |         |         |        |         |        |         |         |         |         |         |        |         |         |         |         |         |         |  |  |
| 31 Teamzugehörigkeit in Monaten  |        |        | -,272**   | -,280**   | 0,039     | 0,026     | ,450**    | ,231**    |           |         |         |        |         |        |         |         |         |         |         |        |         |         |         |         |         |         |  |  |
| 32 Teamergebnis Gruppenaufgabe   |        |        | -,281**   | -,143*    | -,124*    | -,116*    | ,263**    | ,300***   | ,165**    |         |         |        |         |        |         |         |         |         |         |        |         |         |         |         |         |         |  |  |
